# Supplementary material for: Spanish cultural adaptation and validation of the shoulder pain and disability index, and the oxford shoulder score after breast cancer surgery
Source: Springer Nature journal article supplement (doi:10.1186/s12955-015-0256-y), 2015-05-21
Supplement: MOESM1 [file 9764060]

## SHOULDER PAIN AND DISABILITY INDEX (SPADI) SPANISH VERSION

### ESCALA DE DOLOR Y DISCAPACIDAD DE HOMBRO

Nombre del paciente \_\_\_\_\_ Fecha \_\_\_\_\_

#### Por favor, léalo con atención:

Instrucciones: Por favor, rodeé con un círculo el número que mejor describa la respuesta a la pregunta que se le formula.

#### Escala de Dolor:

Ningún dolor 0 1 2 3 4 5 6 7 8 9 10 El peor dolor imaginable

#### ¿Cómo de severo es su dolor?

1. Su peor dolor

0 1 2 3 4 5 6 7 8 9 10

2. Cuando está tumbado/a sobre el lado afecto

0 1 2 3 4 5 6 7 8 9 10

3. Cuando coge algo de un estante alto

0 1 2 3 4 5 6 7 8 9 10

4. Cuando se toca la zona posterior del cuello

0 1 2 3 4 5 6 7 8 9 10

5. Cuando empuja con el brazo afecto

0 1 2 3 4 5 6 7 8 9 10

#### Escala de Discapacidad:

Sin dificultad 0 1 2 3 4 5 6 7 8 9 10 Tan difícil que necesita ayuda

#### ¿Cuánta dificultad tiene usted?

1. Cuando se lava el pelo

0 1 2 3 4 5 6 7 8 9 10

2. Cuando se lava la espalda

0 1 2 3 4 5 6 7 8 9 10

3. Cuando se pone una camiseta o jersey  
0      1      2      3      4      5      6      7      8      9      10
4. Cuando se pone una camisa abotonada por delante  
0      1      2      3      4      5      6      7      8      9      10
5. Cuando se pone unos pantalones  
0      1      2      3      4      5      6      7      8      9      10
6. Cuando coloca un objeto en un estante alto  
0      1      2      3      4      5      6      7      8      9      10
7. Cuando lleva un objeto pesado de 4 kilos y medio  
0      1      2      3      4      5      6      7      8      9      10
8. Cuando coge algo de su bolsillo trasero  
0      1      2      3      4      5      6      7      8      9      10

OTROS COMENTARIOS:

---

---

---

---

Evaluator: \_\_\_\_\_

---

---

---

---
